# Supplementary material for: Self-assembled lanthanum hydroxide microspheres within a reaction–diffusion framework: synthesis, characterization, control and application
Source: Royal Society of Chemistry journal article supplement (doi:10.1039/c5ra22692a), 2015-12-23
Supplement: c5ra22692a1.pdf [file c5ra22692a1.pdf]

## Self-Assembled Lanthanum Hydroxide Microspheres within a Reaction-Diffusion Framework: Synthesis, Characterization, Control and Application

Ghida A. Al Akhrass, Manal Ammar, Houssam El-Rassy and Mazen Al-Ghoul

### Electronic Supporting Information

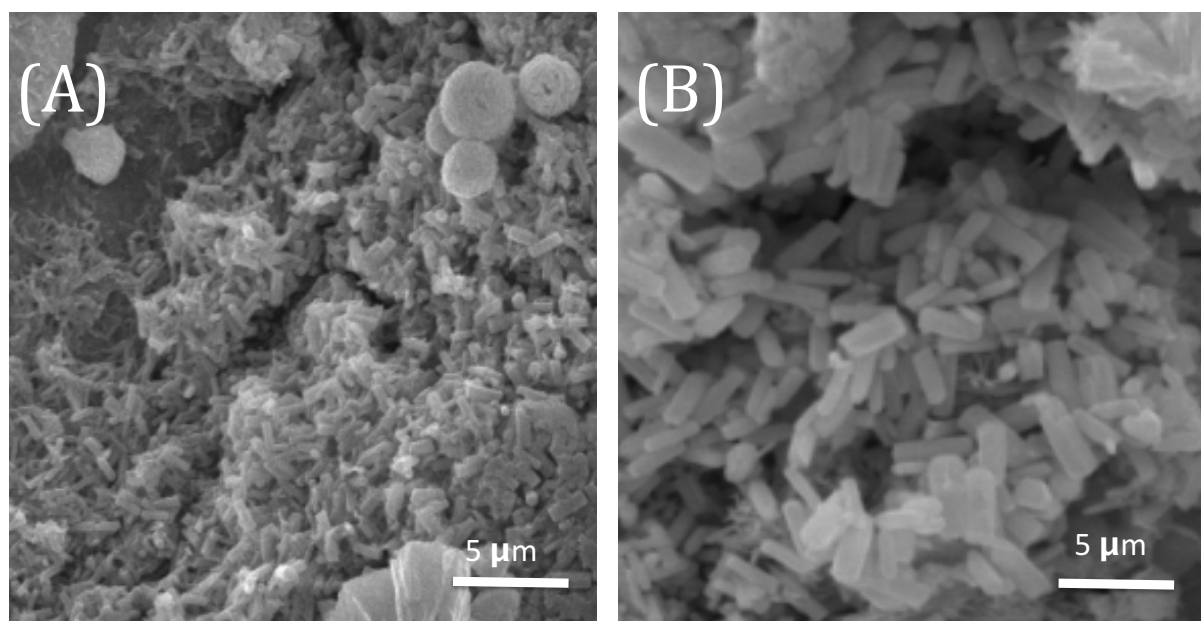

Figure S1: SEM images of rod-like structure of lanthanum hydroxide close to the gel-outer electrolyte interface. (A)  $[La(III)] = 200$  mM; (B)  $[La(III)] = 500$  mM.

Increasing concentration of inner electrolyte (50 mM,200 mM,500

Moving away from the interface

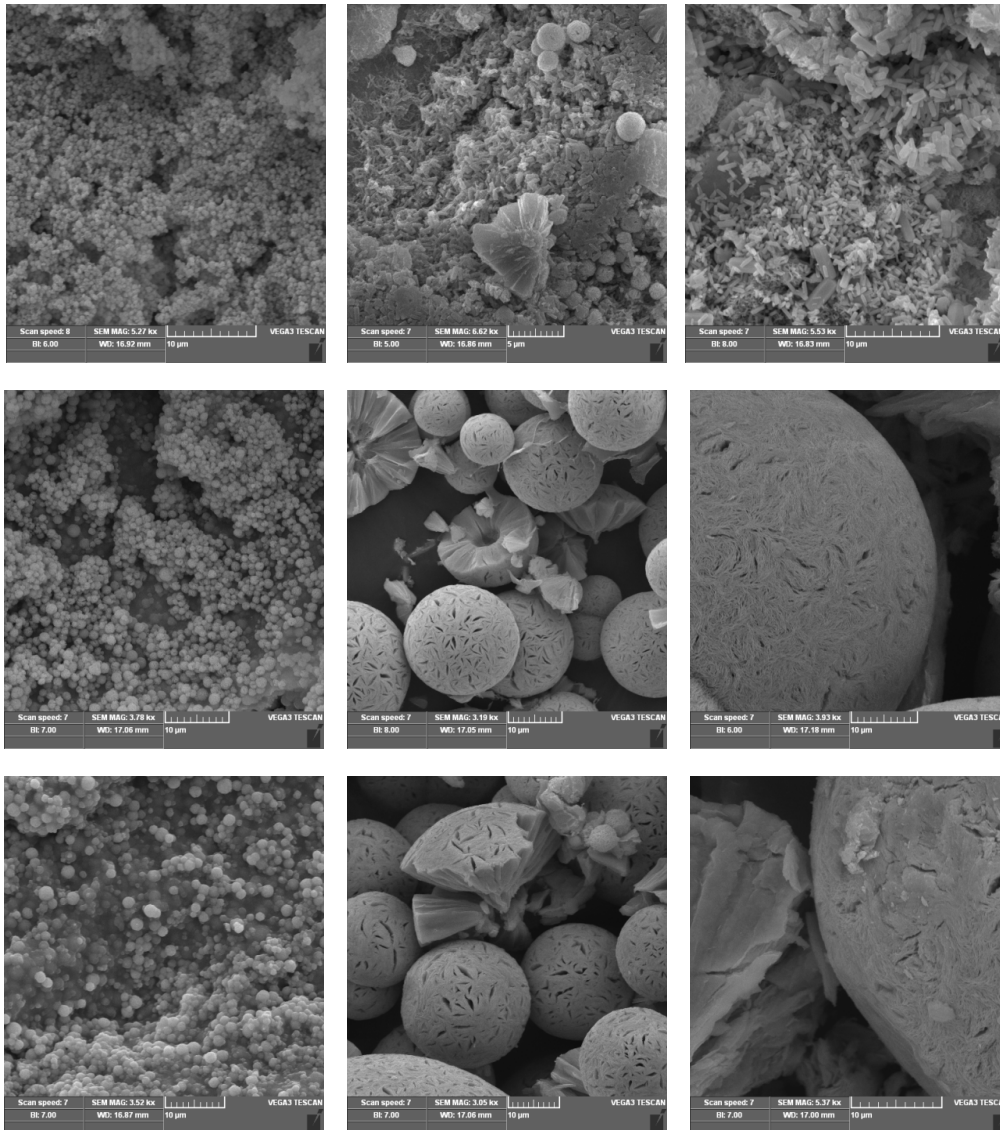

Figure S2. SEM images of  $\text{La}(\text{OH})_3$  particles showing the dependence of particle size and morphology on the inner concentration of  $\text{La}^{3+}$  ( $[\text{La}^{3+}] = 50, 200, 500 \text{ mM}$ ) in 1 % agar with fixed outer concentration of 14.8 M ammonia.

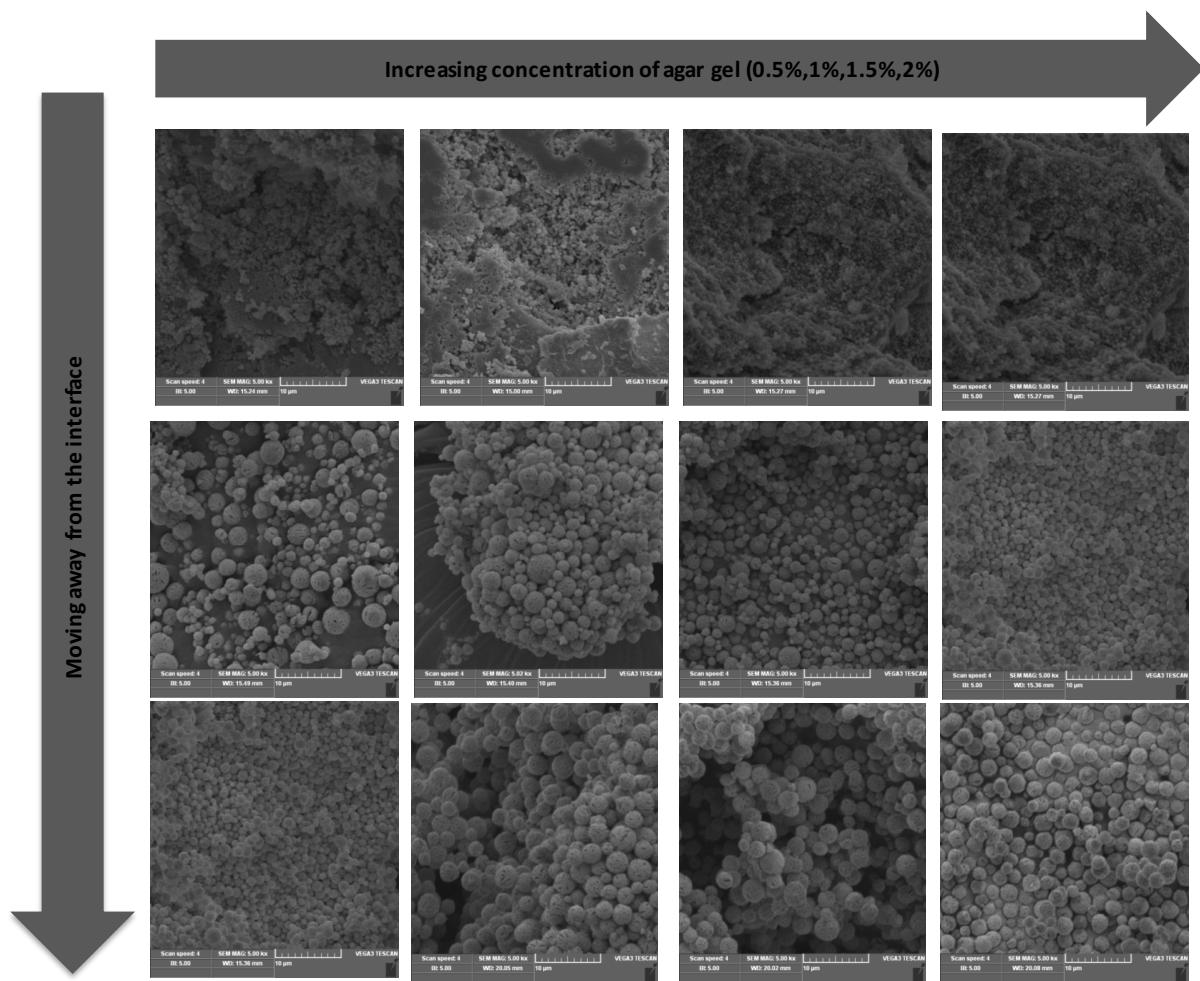

**Figure S3. SEM images of La(OH)<sub>3</sub> particles showing the dependence of particle size on the thickness of agar gel (0.5%, 1%, 1.5%, 2%) with fixed inner concentration of La<sup>3+</sup> ([La<sup>3+</sup>]=50 mM) and outer concentration of 14.8 M ammonia.**

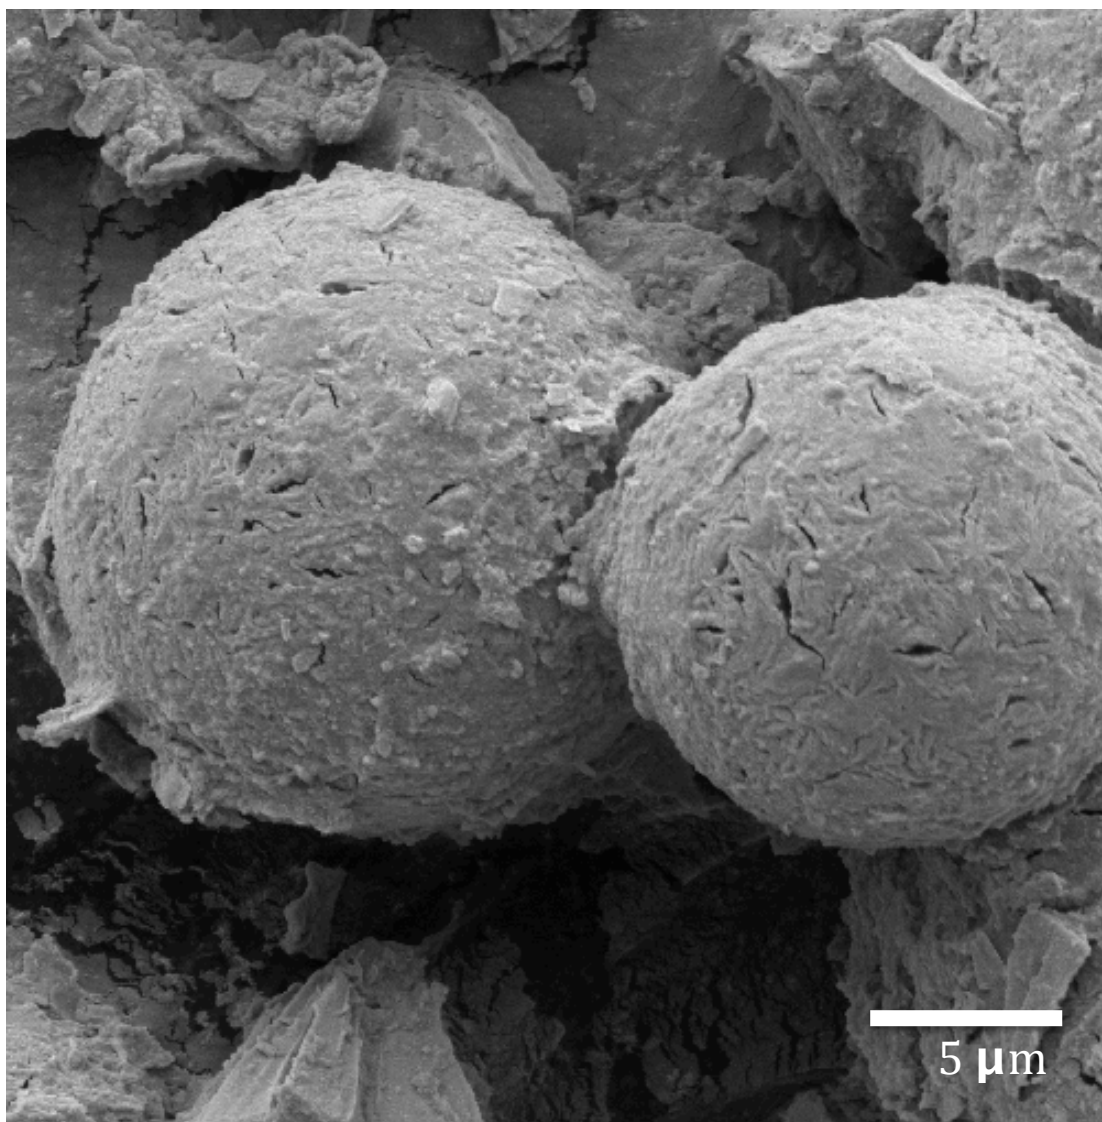

**Figure S4: SEM image showing the morphology of the Lanthanum Hydroxide microspheres after adsorption of Congo Red dye on their surface.**

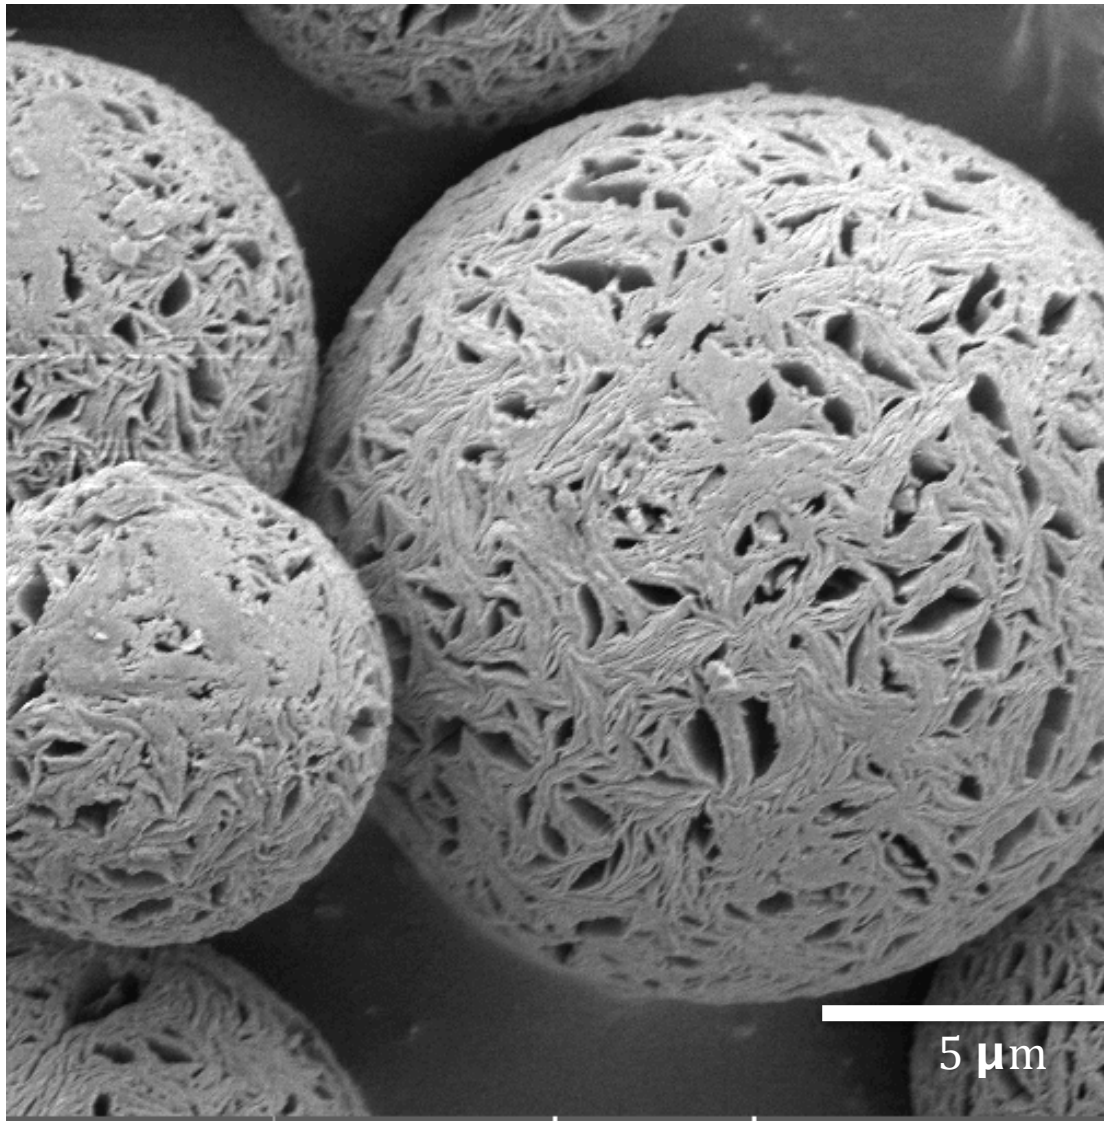

Figure S5: SEM image showing the morphology of the Lanthanum Hydroxide microspheres after calcination at 800C for 7 hours.

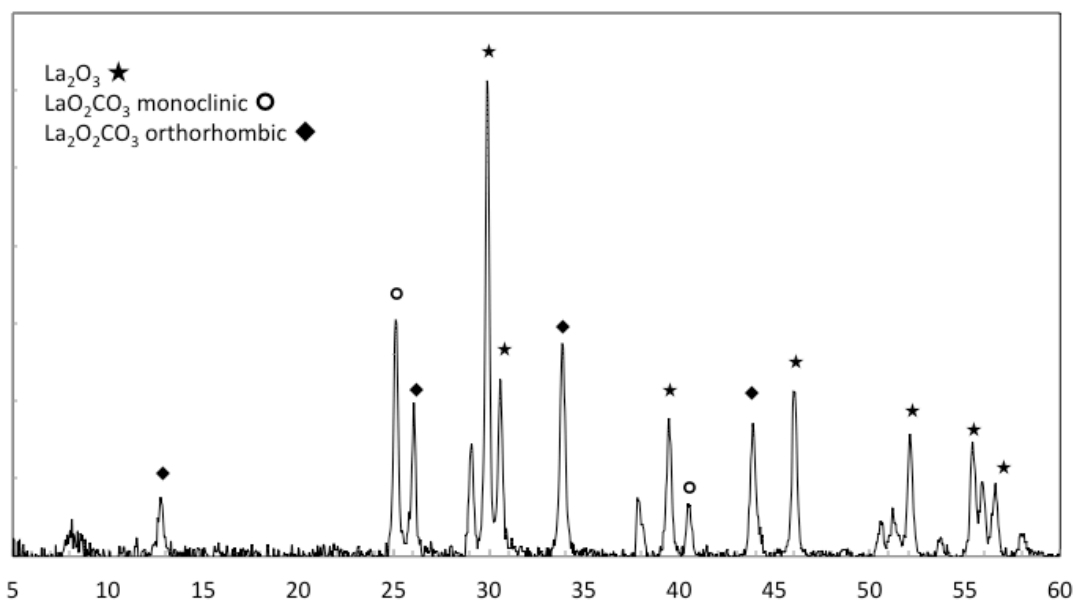

Figure S6: XRD profile for the Lanthanum Hydroxide microspheres after calcination at 800C for 7 hours. The profile shows that the obtained product is a mixture of Lanthanum Oxide and Lanthanum Oxide Carbonate.<sup>1,2</sup>

1. L. C. Gerber, N. Moser, N. A. Luechinger, W. J. Stark and R. N. Grass, *Chemical Communications*, 2012, **48**, 3869-3871.
2. M. Salavati-Niasari, G. Hosseinzadeh and F. Davar, *Journal of Alloys and Compounds*, 2011, **509**, 4098-4103.
